# Supplementary material
Source: PubMed Central journal article supplement (PMC6063478)
Supplement: jci-128-97659-s078.pdf [file jci-128-97659-s078.pdf]

## Supplementary materials

### Supplementary methods

#### Human Study Design

##### *research objectives*

The objective of the human studies analysis was simply to determine whether blood group impacted the outcome of diarrheal illness. This hypothesis developed before initial analysis of any preliminary data.

##### *research subjects*

Samples were archived specimens from research subjects that were healthy adult human volunteers between 18 and 50 years of age without a prior history of exposure to enterotoxigenic *E. coli*. Each of the subjects in these studies served as untreated positive controls in one of four earlier clinical trials [NCT01739231](#), [NCT01060748](#), [NCT00844493](#), and [NCT01922856](#). For all these studies informed consent was obtained after the nature and possible consequences of the studies were explained. Pertinent details of the individual studies can be found at the [ClinicalTrials.gov](#) site.

##### *experimental design*

Blinded blood group determination on archived samples from prior CHIM studies with ETEC H10407.

##### *sample size and selection criteria*

A convenience sample of archived specimens of participants from the four, independent prior ETEC challenge studies was selected based exclusively on the following three criteria:

- (1) Volunteers had been ETEC-naïve prior to challenge with the ETEC H10407 strain at an inoculum of  $\sim 10^7$  colony forming units.

(2) Serum and/or salivary samples were available to determine blood type.

(3) There were available metadata on disease severity.

As the study subjects were from a convenience sample, predetermined power analysis was not performed. Variables were dichotomized to blood group A vs non-A due to the small sample size. After analysis of the first 63 subjects suggested that 103 participants were needed to achieve statistical significance with 80% power and a two-sided alpha of 0.05, additional samples were obtained from the NMRC-Ph2 study yielding 107 samples altogether.

#### *data inclusion/exclusion criteria*

All available samples for which there were accompanying metadata on diarrheal severity and outcome were included (n=107). A single sample was subsequently excluded from further analysis after we were unable to determine the blood type by PCR from an available salivary sample, leaving samples from a total of 106 subjects.

#### *blinding*

All blood group typing was done in a blinded fashion without access to the clinical metadata associated with the samples.

#### *selection of endpoint criteria*

Subjects in these studies were treated with antibiotics once they met previously defined CHIM endpoint criteria (summarized in table S1) or at 120 hours post inoculation to clear their infections.

### **glycan array production and screening**

Glycan arrays containing 411 separate features were fabricated as previously reported (1) except for the addition of a washable fluorescent dye, the free acid of DyLight™649 (0.7 µg/mL, ThermoScientific), to the print buffer as an indicator of successful liquid deposition and spot morphology. The array format and assay have been described previously(1), along with analysis of reproducibility (2) and validation with numerous antibodies and lectins (3, 4).

Briefly, array components were printed onto epoxide-coated slides (SuperEpoxy 2; ArrayIt; Sunnyvale, CA) using a MicroGrid II arrayer (Genomic Solutions; Ann Arbor, MI) fitted with 946 Microspotting Pins (ArrayIt, Sunnyvale, CA). The printing spot size was ~80 µm. The humidity level in the arraying chamber was maintained at 40%~50% during the printing. All neoglycoproteins on the array have been characterized by MALDI-MS to determine the average number of glycans per molecule of BSA. The number after the glycan abbreviation indicates the average number of glycans per molecule of BSA. For example, BG-A1-04 indicates BG-A1 with an average of 4 copies of the glycan per molecule of BSA. Details for the preparation of the neoglycoproteins and characterization have been published previously (5). Printed slides were stored at –20 °C until used. Quality of each batch of slides is assessed by pre-scanning the slides to detect printing defects and testing a standard set of 3 lectins (ConA, WGA, and HPA) in quadruplicate on representative slides from the batch.

The array assay has been described in detail previously (1). Briefly, a 16-well module (Grace Bio-Lab) was affixed to the slide to create independent array wells. Slides were then blocked overnight at 4 °C with 3% BSA (w/v; 200 µL/well) in PBS and then washed 6 times

with PBST (PBS with 0.05% tween 20; 200  $\mu$ L/well). Polyhistidine-tagged rEtpA-6His was diluted to final concentrations of 20 and 200  $\mu$ g/ml in PBST buffer containing 3% bovine serum albumin (BSA, Sigma) and 1% human serum albumin (HSA, Sigma), and then 50  $\mu$ L of each sample was added into two different wells on different slides. Incubation buffer alone served as the negative control for samples analyzed in duplicate. After incubation with rEtpA for 2 h at 37  $^{\circ}$ C (100 rpm), arrays were washed and then probed with mouse monoclonal IgG anti-His<sub>5</sub> antibody (Qiagen, [34660](#)) diluted 1:500 to a final concentration of 0.4  $\mu$ g/ml (1 h at 37  $^{\circ}$ C; 100 rpm), followed by Dylight 549-conjugated affinity purified Goat anti-mouse IgG ([Jackson ImmunoResearch](#), 115-505-071; 1 h at 37  $^{\circ}$ C; 100 rpm). After washing 7 times with PBST (200  $\mu$ L/well), slides were removed from modules, immersed in wash buffer for 5 min, and centrifuged at 1000 rpm for 5 min. Slides were scanned at 10  $\mu$ m resolution with a Genepix 4000B microarray scanner (Molecular Devices Corporation) with excitation/emission wavelengths of 532/575nm and analyzed with Genepix Pro 6.0 software as previously reported(1). The spots were defined as circular features with a diameter of 90  $\mu$ m. The background-corrected median was used for data analysis, and technical faults (e.g., missing spots, lint) were flagged and excluded from further analysis. Heatmaps were assembled in R version 3.2.2, The R Foundation for Statistical Computing, using the gplots and RColorBrewer packages made available through the Comprehensive R Archive Network (CRAN) at <http://cran.wustl.edu/>.

### **Propagation and Maintenance of human small intestinal enteroids**

Enteroid based experiments were performed at both JHU and WUSTL using protocols developed and standardized in each institution. The protocols described below represent

the state-of-the-art at the time experiments were conducted for these studies. Each protocol is fully described and although methodologic variations exist, functional readouts were consistent at both institutions using the defined protocols. Furthermore, the enteroid field is rapidly evolving and investigators seeking the most recent protocols should contact the corresponding authors.

## Human enteroid monolayer protocol (JHU)

Enteroids produced at Johns Hopkins University School of Medicine (JHU) were based on previously published methodology (6). A complete protocol is included here.

### *Transwell Supplies*

24-well plate Transwells, PET membrane, 0.4 µm pore size ([Corning 3470](#))

Collagen IV, from human placenta ([Sigma C5533](#))

### *Media*

(Media used in the preparation and maintenance of enteroids are based on methodology described by Sato, *et al* (7) with some modifications).

Prepared in Advanced DMEM/F12 ([ThermoFisher 12634028](#)) with the following supplementation:

| <b>Sato media</b>              |                     |                                                                                                                                                    |
|--------------------------------|---------------------|----------------------------------------------------------------------------------------------------------------------------------------------------|
| reagent                        | final concentration | source                                                                                                                                             |
| 1 M HEPES                      | 10 mM               | <a href="#">ThermoFisher 15630080</a>                                                                                                              |
| Glutamax                       | 1x                  | <a href="#">ThermoFisher 35050061</a>                                                                                                              |
| B-27                           | 1x                  | <a href="#">ThermoFisher 17504044</a>                                                                                                              |
| N-acetylcysteine               | 1 mM                | <a href="#">Sigma A9165</a>                                                                                                                        |
| human EGF, recombinant         | 50 ng/ml            | <a href="#">R&amp;D Systems 236-EG</a>                                                                                                             |
| (Leu15)-gastrin-1              | 10 nM               | <a href="#">AnaSpec AS-64149</a>                                                                                                                   |
| A83-01                         | 500 nM              | <a href="#">Tocris 2939</a>                                                                                                                        |
| SB 202190                      | 10 µM               | <a href="#">Tocris 1264</a>                                                                                                                        |
| Primocin                       | 100 µg/ml           | <a href="#">Invivogen ant-pm</a>                                                                                                                   |
| Wnt3A conditioned medium       | 50 % v/v            | <a href="#">ATCC CRL-2647</a>                                                                                                                      |
| R-spondin 1 conditioned medium | 15 % v/v            | HA-RSPo1-Fc; 3B cells;<br><a href="#">Kuo laboratory, Stanford University</a>                                                                      |
| Noggin conditioned medium      | 10% v/v             | HEK293T/Noggin-Fc cells; GR van den Brink; Tytgat Institute for Liver and Intestinal Research, Academic Medical Center, Amsterdam, The Netherlands |

### Procedure

1. Prepare collagen IV solution from powder dissolved in 100 mM acetic acid (1 mg/mL). Store aliquots at 4 °C (short-term) or -20 °C (long-term).
  - 1.1.1. To coat Transwells, prepare a diluted collagen IV solution in sterile cell culture water at 34 µg/mL. This corresponds to 100 µL of collagen IV solution per 3 mL water.
  - 1.1.2. Add 100 µL of the diluted collagen IV solution to each Transwell surface to provide a plating density of 10 µg/cm<sup>2</sup>. Transfer plate to 37 °C incubator for at least 2 h, or seal plate edges with parafilm and store at 4 °C overnight.

2. Prepare Sato medium as above with following additions:

| Sato/+Y/+C medium |                     |                             |
|-------------------|---------------------|-----------------------------|
| reagent           | final concentration | source                      |
| Y-27632           | 10 µM               | <a href="#">Tocris 1254</a> |
| CHIR99021         | 10 µM               | <a href="#">Tocris 4423</a> |

3. Prepare enteroids from 3-D culture:
  - 3.1. Remove growth medium and replace with 1 mL Cell Dissociation Reagent (Stem Cell Technologies [07174](#)).
  - 3.2. Break up Matrigel with a mini cell scraper and incubate the plate on a shaking platform at 250 rpm, 4 °C for ~30 min to aid in dissolution of Matrigel.
  - 3.3. Use a P200 pipet to triturate and fragment the enteroids.
  - 3.4. Transfer suspension to a 15 mL conical tube and wash with Advanced DMEM/F12. Spin at 1200 rpm, 10 min, 4 °C to pellet cells.
  - 3.5. Aspirate collagen IV solution and wash transwell surface with 100 µL Advanced DMEM/F12.
  - 3.6. Add 600 µL Sato/+Y/+C to the bottom chamber of each transwell.
  - 3.7. Resuspend enteroid fragments isolated from Matrigel in a volume of Sato/+Y/+C that will provide 100 µL of suspension/Transwell. Pipet 100 µL of suspension into the upper chamber of each Transwell.

**n.b.** Small fragments are much more likely to attach and flatten successfully than large fragments/intact enteroids. The definition of a small fragment is something in the size range of a single, just-emerged bud.

- 3.8. Each Transwell should receive ~50 small enteroid fragments at seeding to yield efficient formation of a confluent monolayer within 4-7 d.
- 3.9. Feed every 2-3 days with Sato medium; 600  $\mu$ L in bottom chamber and 100  $\mu$ L in upper chamber until confluent.
- 3.10. Monitor Transwells daily for evidence of fragment flattening and spreading. Days to confluency can range from ~5 days to >2 weeks, depending on seeding density.
- 3.11. Examine by light microscopy and measure TER (Epithelial volt/Ohm meter, EVOM2, World Precision Instruments [300523](#)) periodically to determine confluency.
- 3.12. Upon reaching confluency, switch to Differentiation Media (remove all factors from the Advanced DMEM/F12 except B27, N-acetylcysteine, and EGF) for 5 days and follow TER each day to assess progress.

## Human enteroid monolayer protocol (WUSTL)

Enteroids produced at Washington University School of Medicine (WUSTL) were based on previously published methodology(8). A complete protocol is included here.

### Supplies

96 well plates ([TPP 92096](#), TPP, Switzerland)

Transwells, PET membrane, 0.4 µm pore size ([Corning 3470](#), Corning, NY, USA)

Matrigel (BD Cat. No. [354234](#))

### media

L-WRN conditioned media was prepared based on methodology described by van Dussen, *et al*(8) with modifications as described below.

To culture and propagate enteroids , L-WRN conditioned media was diluted 1:1 with primary media (Advanced DMEM/F12 ThermoFisher, [12634-010](#)) to prepare 50% L-WRN conditioned media which was supplemented with 10µM SB431542 (TGFβR inhibitor) and 10 µM Y27632 (Rock inhibitor) for use in the maintenance of enteroids.

| 50% L-WRN Media              |                     |                                   |
|------------------------------|---------------------|-----------------------------------|
| reagent                      | final concentration | source/(reference)                |
| FBS                          | 20%                 | Sigma <a href="#">F6178</a>       |
| Glutamax                     | 1x                  | Sigma <a href="#">G7513</a>       |
| 100x Penicillin/Streptomycin | 1x                  | Sigma <a href="#">P4333</a>       |
| SB431542                     | 10 µM               | Selleckchem <a href="#">S1067</a> |
| Y-27632                      | 10 µM               | Selleckchem <a href="#">S1049</a> |
| L-WRN Media                  | 50 % v/v            | (8)                               |

Wash Media: Prepared using DMEM/F12 with HEPES (SIGMA D6421-500ML) with the following supplementation:

| Wash Media                   |                     |                                       |
|------------------------------|---------------------|---------------------------------------|
| reagent                      | final concentration | source                                |
| FBS                          | 10%                 | Sigma <a href="#">F6178</a>           |
| Glutamax                     | 1x                  | <a href="#">ThermoFisher 35050061</a> |
| 100x Penicillin/Streptomycin | 1x                  | Sigma <a href="#">P4333</a>           |

### *Procedure*

1. Dilute Matrigel 1:30 in PBS.
2. pre-coat wells of 96 well plate or Transwell at 37°C for 1 hour
3. Prepare enteroids from 3-D culture:
  - 3.1. Dislodge cells with a sterile 1 ml pipette tip
  - 3.2. re-suspend in 1 ml PBS-EDTA(0.5mM)
  - 3.3. pellet at 150 g for 5 min
  - 3.4. re-suspend in 300 ul 1x trypsin (Sigma [t4549](#))
  - 3.5. Incubate at 37°C for 90 seconds.
  - 3.6. Add 1 ml wash media
  - 3.7. Use a P1000 pipet to triturate and fragment the enteroids (~300 times).
  - 3.8. Add another 4 ml wash media
  - 3.9. pellet at 150g for 5 min.
  - 3.10. Wash in 1 ml wash media
  - 3.11. pellet at 150g for 5 min.
  - 3.12. Re-suspend enteroids in 50% L-WRN media with inhibitors
  - 3.13. Aspirate the diluted Matrigel suspension from the 96 well plate or Transwell and add 200 ul of enteroids in 50% L-WRN media. If using transwells, add 500 µl of 50% L-WRN to the bottom of the transwell.
4. 24 hours later, remove the L-WRN media and replace with 200 µl of 5% L-WRN media with Y-27632 (replace media at bottom of Transwell with 500 µl of same 5% L-WRN media).
5. Monitoring of Transwells

- 5.1. Replace media every 24 hours\*.
- 5.2. Monitor daily by microscopy for evidence of cell flattening and spreading. Days to confluency can range from ~5 days to >2 weeks, depending on seeding density.
- 5.3. Document TER using an epithelial Ohm/voltmeter upon confluency.
- 5.4. \**n.b.* for experiments involving bacteria penicillin and streptomycin are removed from media.

## Supplementary figures

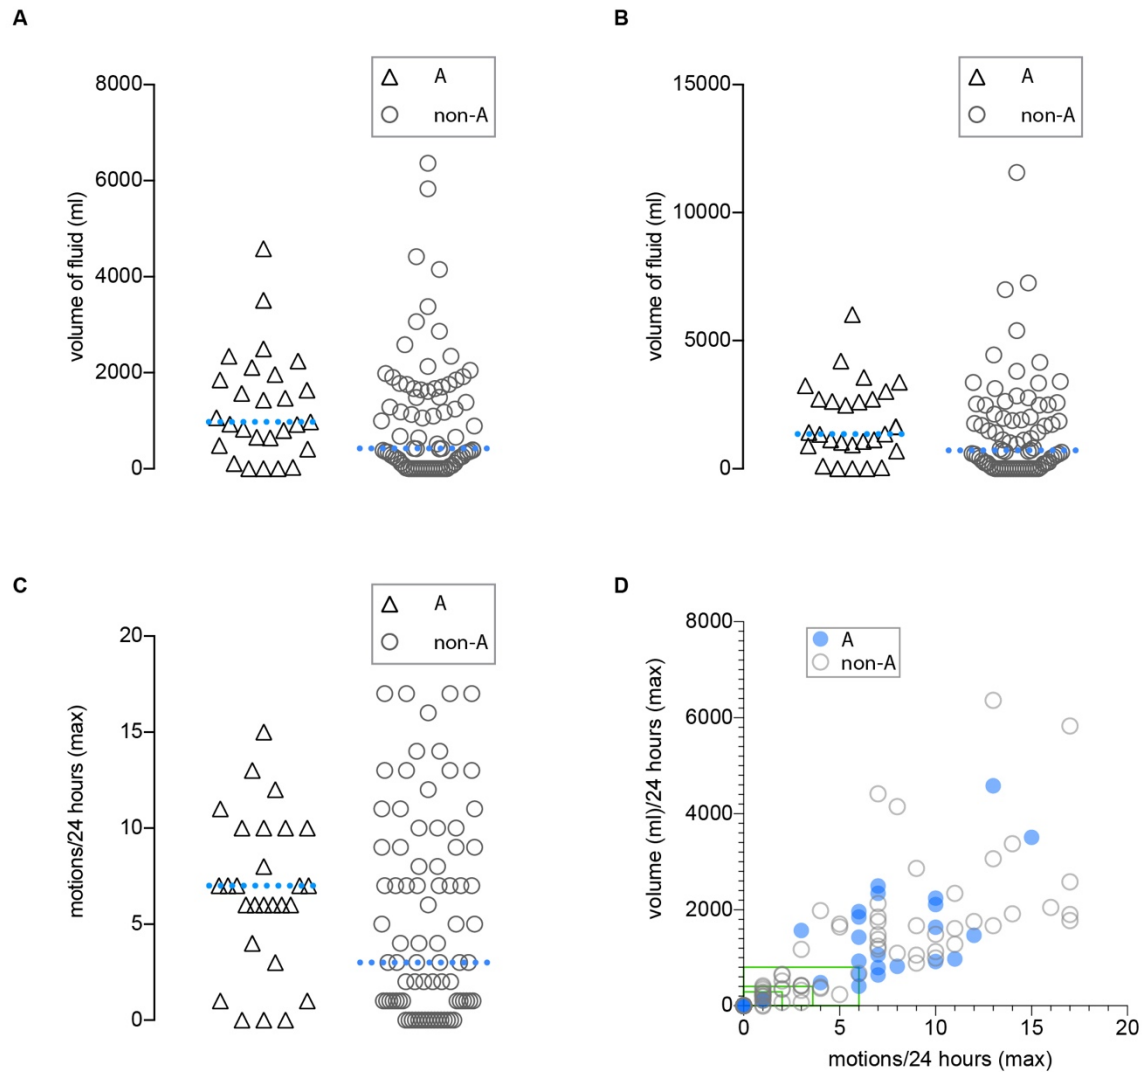

**Fig. S1. characteristics of diarrheal illness in volunteers by blood group**

**A.** maximal volume of diarrheal stool in a 24 hour period; blood group A median=979; non-A=424 ml). **B.** total volume of diarrheal stool prior to treatment (median blood group A: 1352 ml; median non-A: 719). **C.** maximal number of diarrheal stools in a 24 hour period media blood group A: 7; median non-A: 3). Dashed lines in **A-C** for each group represent median values. **D.** Comparison of maximal stool volume and maximal number of diarrheal episodes in a 24 hour period following infection of volunteers of blood group A (n=27, blue circles) and non-A (n=79, open circles) with ETEC H10407. Green rectangles at lower left of the figure represent threshold values for mild, moderate and severe diarrhea(9).

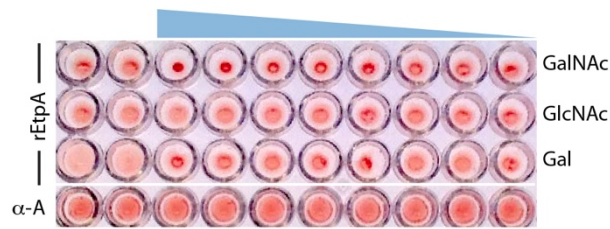

**Fig. S2. GalNAc, the terminal sugar of A blood group inhibits EtpA-mediated hemagglutination.**

N-Acetylgalactosamine (GalNAc), the terminal saccharide residue on blood group A, but not N-Acetylglucosamine (GlcNAc), or Galactose (Gal) the terminal saccharide residue on blood group B, inhibits EtpA-mediated hemagglutination of A1 RBCs. Positive control wells containing rEtpA and A1 RBCs are shown in first 2 columns at left. Anti-A blood group antibody positive controls ( $\alpha$ -A) are shown in the bottom row. Wells at right contain 2-fold decreasing concentrations of the indicated sugars, beginning at a starting concentration of 50 mM.

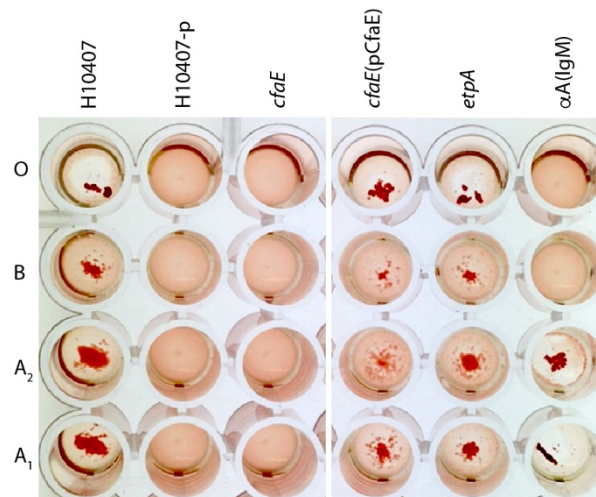

**Fig. S3. CFA/I promotes non-selective hemagglutination of erythrocytes.**

Whole, wild type H10407 bacteria expressing CFA/I agglutinate erythrocytes from all major blood types (column 1). Loss of either the full plasmid carrying CFA/I (H10407-p, column 2) or the CFA/I tip adhesin (*cfaE*, column 3) abrogates agglutination. Agglutination is restored by complementation of *cfaE* (column 4). Loss of EtpA has no effect on CfaE-dependent non-specific agglutination (column 5). Control wells containing anti-A specific antibodies ( $\alpha$ A IgM) are shown in column 6. (Note that experiments were performed with whole bacteria under conditions that favor CFA/I expression, but minimize the impact of EtpA. Assays in this experiment also used flat-bottom plates in which agglutinated erythrocytes clump and settle to the bottom while non-agglutinated cells are dispersed).

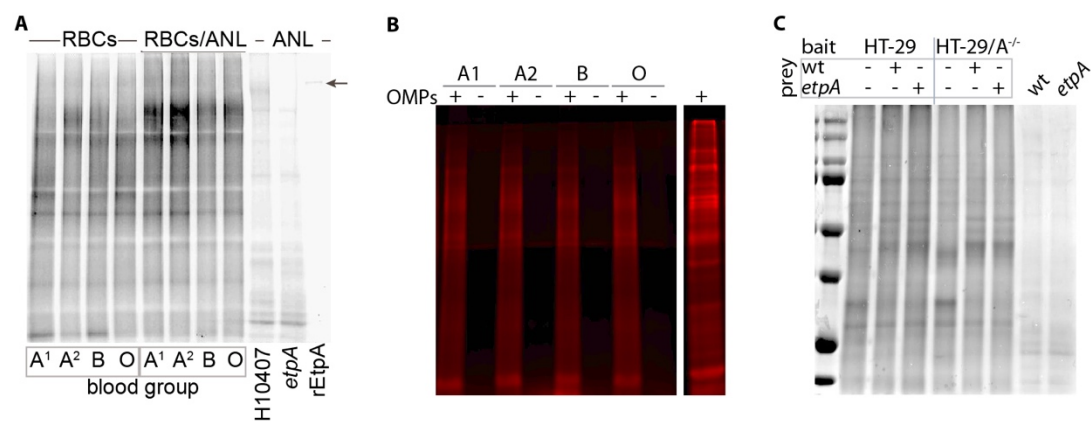

**Fig. S4. EtpA is the major blood group A lectin in ETEC**

**A.** loading controls for the data shown in figure 4E. Shown in the image of a Coomassie stained gel are RBCs from different blood groups at left and the RBC mixed with ANL labeled peptides at right. **B.** ANL-labeled outer membrane proteins (OMPs) (+ lanes) were added to erythrocytes ghosts from each of the blood groups. Negative lanes contain only the corresponding RBC ghosts. Lane at right shows the input ANL-tagged OMPs. **C.** Coomassie-stained gel image of samples from experiment shown in 5B.

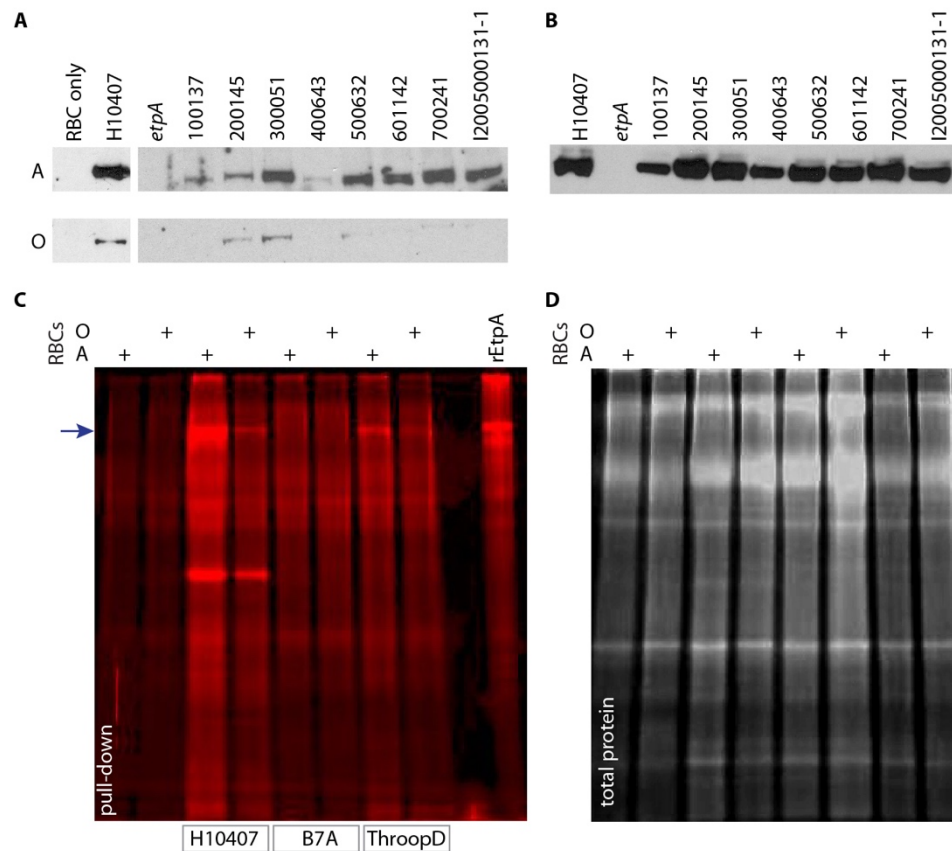

**Fig. S5. preferential binding of blood group A is shared by EtpA molecules from a diverse collection of isolates.**

**A.** Anti-EtpA-immunoblots of RBC ghost pull-downs following incubation of concentrated culture supernatants from a geographically disparate collection of EtpA producing strains with erythrocytes of blood group A (top) and blood group O (bottom). RBC only control and H10407+ control are shown in blot images on left of each panel. The *etpA* deletion mutant negative control and additional strains at shown on right. Geographic origin of the isolates is as follows: H10407 (Bangladesh); 100137 (Gambia); 200145 (Mali); 300051 (Mozambique); 400643 (Kenya); 500632 (India); 601142 (Bangladesh); 700241 (Pakistan); I2005000131-1 (Mexico). **B.** relative abundance of EtpA in supernatants from indicated strains. **C.** pull-down of EtpA from supernatants of ANL-labelled strains with erythrocytes from blood group O and A. Shown from left to right are RBC-pull down with H10407; B7A, an *etpA*-negative isolate; and ThroopD. Arrow at far left indicates migration of EtpA. **D.** total protein loading controls (Oriole-stained gel) for samples in C.

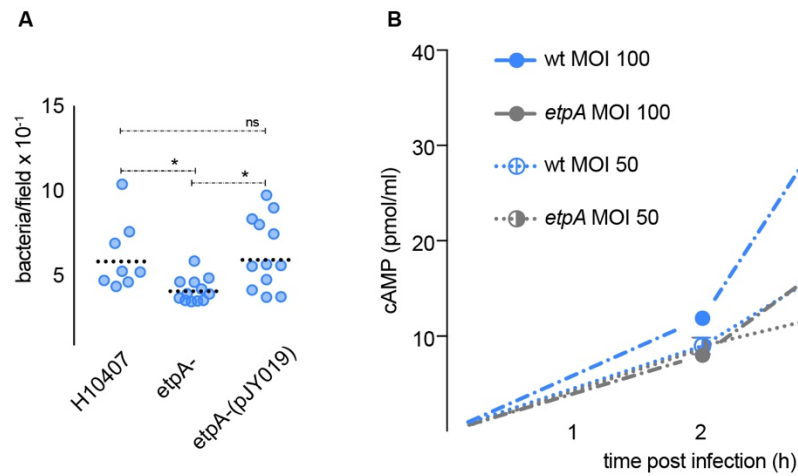

**Fig. S6. EtpA is required for optimal adhesion and toxin delivery**

**A.** EtpA is required for optimal interaction of bacteria with blood group A expressing enterocytes (shown are the wild type H10407 (n=8), the *etpA* mutant (n=12) and the complemented mutant *etpA*(pJY019) (n=12). Data represent combined results of two separate experiments. Statistical significance determinations were made Kruskal-Wallis testing for multiple comparisons of non-parametric data \*p≤0.05; ns non-significant. **B.** EtpA accelerates toxin delivery to A blood group positive HT-29 cells. Shown are the H10407 wild type (wt), and the *etpA* mutant at two different multiplicities of infection (MOI), 100 and 50 bacteria per cell. Points represent mean ± SEM of n=3 replicates.

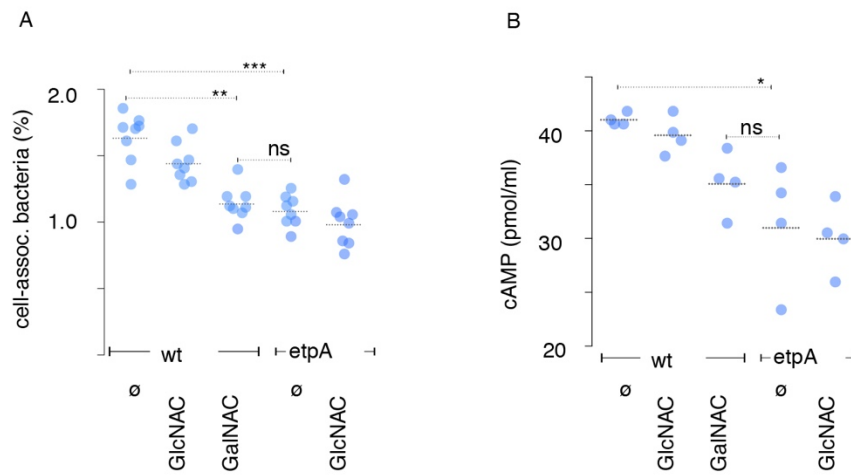

**Fig. S7. exogenous GalNAC inhibits bacterial adhesion and toxin delivery.**

**A.** Adhesion is significantly impaired by exogenous GalNAC the terminal A blood group sugar residue. Dashed horizontal lines indicate geometric mean values (n=8 technical replicates). **B.** Toxin delivery is impaired by exogenous GalNAC. Dashed horizontal lines indicate geometric mean values (n=4 technical replicates). Adjusted p values: \*\*\*p<0.001, \*\*p<0.01, and \*p<0.05 obtained by Kruskal-Wallis testing for multiple comparisons of non-parametric data.

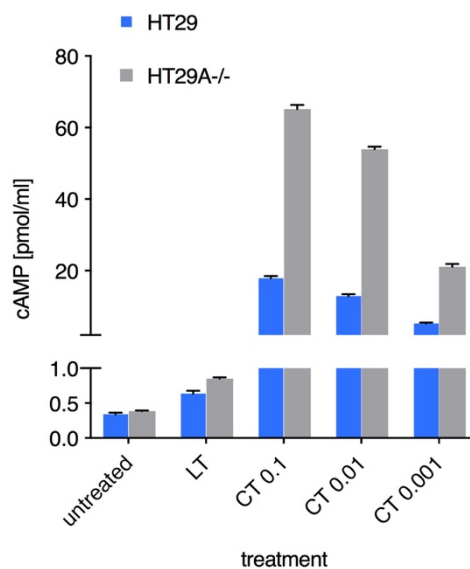

**Fig. S8. Differential activation of HT-29 and HT-29A<sup>-/-</sup> cells by heat-labile toxin (LT) and cholera toxin (CT).**

Results are the summary of n=6 technical replicates following stimulation of HT29 cells with either LT or CT at the indicated dose.

## Supplementary tables

**table s1**

| Endpoint criteria for human challenge studies                                                                                                                                                                                                                                                                         |                |       |                   |          |        |
|-----------------------------------------------------------------------------------------------------------------------------------------------------------------------------------------------------------------------------------------------------------------------------------------------------------------------|----------------|-------|-------------------|----------|--------|
|                                                                                                                                                                                                                                                                                                                       | None           | Mild  |                   | Moderate | Severe |
| Number of stools Grade 3-5*                                                                                                                                                                                                                                                                                           | 0              | 1     | 2-3               | 4-5      | ≥ 6    |
|                                                                                                                                                                                                                                                                                                                       |                | AND   | AND               | OR       | OR     |
| Stool Weight of Grade 3-5 stools (g)                                                                                                                                                                                                                                                                                  | Not Applicable | ≥ 300 | ≥ 200 in 24 hours | 401-800  | > 800  |
| Treatment was initiated for severe diarrhea, moderate diarrhea ≥48 hours, *Stool was graded as follows: grade 1, firm formed; grade 2, soft formed; grade 3, viscous opaque liquid or semiliquid which assumed the shape of the container; grade 4, watery opaque liquid; and grade 5, clear watery or mucoid liquid. |                |       |                   |          |        |

table s2

**Summary of H10407 controlled human infection studies**

| study<br>(NCT identifier) | Illness         | blood group |        |                      | total (%) |
|---------------------------|-----------------|-------------|--------|----------------------|-----------|
|                           |                 | O           | B      | A or AB <sup>†</sup> |           |
| NCT01739231               | None            | 7 (54)      | 1 (20) | 1 (11)               | 9 (33)    |
|                           | Moderate-severe | 6 (46)      | 4 (80) | 8 (89)               | 18 (67)   |
|                           | Total           | 13          | 5      | 9                    | 27        |
| NCT01060748               | None            | 4 (27)      | 3 (60) | 1 (14)               | 8 (30)    |
|                           | Moderate-severe | 11 (73)     | 2 (40) | 6 (86)               | 19 (70)   |
|                           | Total           | 15          | 5      | 7                    | 27        |
| NCT00844493*              | None            | 2 (29)      | 0 (0)  | 1 (50)               | 3 (33)    |
|                           | Moderate-severe | 5 (71)      | 0 (0)  | 1 (50)               | 6 (67)    |
|                           | Total           | 7           | 0      | 2                    | 9         |
| NCT01922856               | None            | 15 (52)     | 3 (60) | 2 (22)               | 20 (47)   |
|                           | Moderate-severe | 14 (48)     | 2 (40) | 7 (78)               | 23 (53)   |
|                           | Total           | 29          | 5      | 9                    | 43        |

Study numbers at left refer to [ClinicalTrials.gov](https://clinicaltrials.gov) identifiers. \* Johns Hopkins University Center for Immunization Research human challenge model refinement study(10). †Only 3 patients had a blood type of AB, 2 in the NCT01739231 study (1 in each illness category), and one with severe diarrhea in the NCT01922856 study.

table s3

**Table S3. diarrheal severity is not race dependent**

| Race  | Diarrheal Severity (N, (%)) |                    | Total (N) |
|-------|-----------------------------|--------------------|-----------|
|       | None or Mild                | Moderate or Severe |           |
| Black | 33 (36)                     | 59 (64)            | 92        |
| White | 4 (40)                      | 6 (60)             | 10        |
| Other | 3 (60)                      | 2 (40)             | 5         |
| Total | 40 (37)                     | 67 (63)            | 107*      |

( $\chi^2$  (df = 2, n=107), = 1.212,  $p$  = 0.546). \*One additional patient is included in this analysis for which blood typing was not available.

**table s4**

| <b>Table S4. Diarrheal severity does not correlate with age</b>                                                                  |        |           |
|----------------------------------------------------------------------------------------------------------------------------------|--------|-----------|
| Diarrheal Severity                                                                                                               | Age    |           |
|                                                                                                                                  | Median | Range     |
| None or Mild                                                                                                                     | 35.4   | 21.8-49.0 |
| Moderate or Severe                                                                                                               | 34.0   | 18.0-49.0 |
| (Mann Whitney U $p=0.784$ ). (n=107; One additional patient is included in this analysis for which blood typing is unavailable). |        |           |

table s5

| <b>Table S5. bacterial strains and plasmids used in these studies</b>                                                                                             |                                                                                                                                                                    |                     |
|-------------------------------------------------------------------------------------------------------------------------------------------------------------------|--------------------------------------------------------------------------------------------------------------------------------------------------------------------|---------------------|
| <b>Strain</b>                                                                                                                                                     | <b>Description</b>                                                                                                                                                 | <b>Reference(s)</b> |
| H10407-P                                                                                                                                                          | plasmid cured strain of H10407                                                                                                                                     | (11)                |
| H10407kan                                                                                                                                                         | <i>cfaE</i> deletion mutant; Km <sup>R</sup>                                                                                                                       | (12)                |
| H10407kan( <i>pcfaE</i> )                                                                                                                                         | plasmid complemented deletion strain Km <sup>R</sup> , Gm <sup>R</sup>                                                                                             | (12)                |
| jf576                                                                                                                                                             | LT- ( <i>eltAB</i> ::Km <sup>R</sup> ) mutant of H10407                                                                                                            | (13)                |
| jf1668                                                                                                                                                            | <i>etpA</i> ::Cm <sup>R</sup> mutant of H10407                                                                                                                     | (14)                |
| jf1696                                                                                                                                                            | Top10(pJL017, pJL030), Amp <sup>R</sup> , Cm <sup>R</sup>                                                                                                          | (15)                |
| jf1697                                                                                                                                                            | jf1668 transformed with pJY019, Amp <sup>R</sup>                                                                                                                   | (15)                |
| jf1700                                                                                                                                                            | jf1668 tranformed with pBAD/Myc-His A, Amp <sup>R</sup>                                                                                                            | (15)                |
| jf3422                                                                                                                                                            | H10407 transformed with pBAD-MetRS, Amp <sup>R</sup>                                                                                                               | this study          |
| jf3904                                                                                                                                                            | jf1668 transformed with pBAD-MetRS, Amp <sup>R</sup>                                                                                                               | this study          |
| Top10                                                                                                                                                             | F- mcrA Δ( <i>mrr-hsdRMS-mcrBC</i> ) φ80/ <i>lacZ</i> ΔM15<br>Δ <i>lacX74 recA1 araD139 Δ(araleu) 7697 galU galK rpsL</i><br>(Str <sup>R</sup> ) <i>endA1 nupG</i> | Invitrogen          |
| <b>wild type ETEC strains</b>                                                                                                                                     |                                                                                                                                                                    |                     |
| <b>strain</b>                                                                                                                                                     | <b>description, (origin, year of isolation)</b>                                                                                                                    | <b>references</b>   |
| H10407                                                                                                                                                            | O78:H11; CFA/1;LT+/STh/STp+;EtpA+ (Bangladesh, 1970s)                                                                                                              | (11, 16)            |
| ThroopD                                                                                                                                                           | O63:Nm; LT+/ST+; EtpA+ (Texas, 1976)                                                                                                                               | (17)                |
| B7A                                                                                                                                                               | O148:H28; LT+/ST+;EtpA- (Vietnam, 1970)                                                                                                                            | (18)                |
| 100137                                                                                                                                                            | O64; CS6;LT+;EtpA+ (Gambia, 2013)                                                                                                                                  | (19)                |
| 200145                                                                                                                                                            | LT+/STh+;CS1,CS3,CS21; EtpA+ (Mali, 2013);                                                                                                                         | (19)                |
| 300051                                                                                                                                                            | O71:H44;CFA/I,CS21;STh;EtpA+ (Mozambique, 2013)                                                                                                                    | (19)                |
| 400643                                                                                                                                                            | CS5, CS14;STh; EtpA+ (Kenya, 2013);                                                                                                                                | (19)                |
| 500632                                                                                                                                                            | O78:NT; CS14; STh; EtpA+ (India, 2013);                                                                                                                            | (19)                |
| 601142                                                                                                                                                            | CF-negative;LT; EtpA+ (Bangladesh, 2013)                                                                                                                           | (19)                |
| 700241                                                                                                                                                            | CS12; LT; EtpA+ (Pakistan, 2013);                                                                                                                                  | (19)                |
| I2005000131-1                                                                                                                                                     | LT+STh+; EtpA+ (Mexico, 2005).                                                                                                                                     | (20)                |
| <b>Plasmids</b>                                                                                                                                                   |                                                                                                                                                                    |                     |
| Plasmid                                                                                                                                                           |                                                                                                                                                                    |                     |
| pJL017                                                                                                                                                            | <i>etpBA</i> cloned into pBAD/Myc-His A, with <i>etpA</i> in-frame with myc and 6His coding regions, Amp <sup>R</sup>                                              | (21)                |
| pJL030                                                                                                                                                            | <i>etpC</i> gene cloned into pACYC184, Cm <sup>R</sup>                                                                                                             | (14)                |
| pJY019                                                                                                                                                            | <i>etpBAC</i> locus cloned into pBAD/Myc-His A                                                                                                                     | (15)                |
| pAM1                                                                                                                                                              | expresses NLL-MetRS from endogenous MetG promoter, Km <sup>R</sup> , Cm <sup>R</sup>                                                                               | (22)                |
| pBAD/Myc-His B                                                                                                                                                    | arabinose inducible expression plasmid, Amp <sup>R</sup>                                                                                                           | Invitrogen          |
| pBAD-MetRS                                                                                                                                                        | 1647 bp MetRS fragment from pAM1 cloned into <i>NcoI-EcoRI</i> sites of pBAD/Myc-His B by In-Fusion; Amp <sup>R</sup>                                              | this study          |
| Km <sup>R</sup> =kanamycin resistant; Gm <sup>R</sup> =gentamicin resistant; Cm <sup>R</sup> = chloramphenicol resistant; Amp <sup>R</sup> = ampicillin resistant |                                                                                                                                                                    |                     |

table s6

**Table S6. primers used in these studies**

| primer designation | sequence (5'-3')                              | description                                                                                                                  | reference(s) |
|--------------------|-----------------------------------------------|------------------------------------------------------------------------------------------------------------------------------|--------------|
| jf091715.1         | <u>gaggaattaa ccatg</u> ATGAC TCAAGTCGCG AAGA | 5' primer to amplify MetRS ORF. vector sequence for In-Fusion cloning into pBAD/Myc-His B at <u>NcoI</u> site is underlined  | this study   |
| jf091715.2         | <u>agaagcttcgaatt</u> TCATTTAGAGGCTTCCACC     | 3' primer to amplify MetRS ORF. vector sequence for In-Fusion cloning into pBAD/Myc-His B at <u>EcoRI</u> site is underlined | this study   |
| jf062014.1         | CAGAAGCTGAGTGGAGTTTCCAGG                      | ABO glycosyltransferase Exon 6 5' primer                                                                                     | (23)         |
| jf062014.2         | CTGAACTGCTCGTTGAGGATGTCTG                     | ABO glycosyltransferase Exon 6 3' primer                                                                                     | (23)         |
| jf062014.3         | AAGGACGAGGGCGATTTCTACTAC                      | ABO glycosyltransferase Exon 7 5' primer                                                                                     | (23)         |
| jf062014.4         | CGTTGGCCTGGTCGACCATCATG                       | ABO glycosyltransferase Exon 7 3' primer                                                                                     | (23)         |
| jf062014.7         | GTGCAGTAGGAAGGATGTCCTCGTGACG                  | ABO glycosyltransferase Exon 6 5' primer AB mismatch                                                                         | (23)         |
| jf062014.8         | GTGCAGTAGGAAGGATGTCCTCGTGACA                  | ABO glycosyltransferase Exon 6 5' primer AO mismatch                                                                         | (23)         |
| jf062014.11        | AAGGACGAGGGCGATTTCTACTCTC                     | ABO glycosyltransferase Exon 7 5' primer AO mismatch                                                                         | (23)         |
| jf062014.12        | AAGGACGAGGGCGATTTCTACTCTA                     | ABO glycosyltransferase Exon 6 5' primer B mismatch                                                                          | (23)         |

## references for supplementary materials

1. C. T. Campbell, Y. Zhang, J. C. Gildersleeve, Construction and Use of Glycan Microarrays. *Curr. Protocols Chem. Biol.* **2**, 37-53 (2010).
2. O. Oyelaran, L. M. McShane, L. Dodd, J. C. Gildersleeve, Profiling human serum antibodies with a carbohydrate antigen microarray. *J. Proteome Res.* **8**, 4301-4310 (2009).
3. J. C. Manimala, T. A. Roach, Z. Li, J. C. Gildersleeve, High-throughput carbohydrate microarray profiling of 27 antibodies demonstrates widespread specificity problems. *Glycobiology* **17**, 17C-23C (2007).
4. J. C. Manimala, T. A. Roach, Z. Li, J. C. Gildersleeve, High-throughput carbohydrate microarray analysis of 24 lectins. *Angewandte Chemie* **45**, 3607-3610 (2006).
5. Y. Zhang, J. C. Gildersleeve, in *Carbohydrate Microarrays: Methods and Protocols*, Y. Chevolut, Ed. (Humana Press, 2012), vol. 808, pp. 155-165.
6. J. In, J. Foulke-Abel, N. C. Zachos, A. M. Hansen, J. B. Kaper, H. D. Bernstein, M. Halushka, S. Blutt, M. K. Estes, M. Donowitz, O. Kovbasnjuk, Enterohemorrhagic *Escherichia coli* reduce mucus and intermicrovillar bridges in human stem cell-derived colonoids. *Cell Mol Gastroenterol Hepatol* **2**, 48-62 e43 (2016).
7. T. Sato, D. E. Stange, M. Ferrante, R. G. Vries, J. H. Van Es, S. Van den Brink, W. J. Van Houdt, A. Pronk, J. Van Gorp, P. D. Siersema, H. Clevers, Long-term expansion of epithelial organoids from human colon, adenoma, adenocarcinoma, and Barrett's epithelium. *Gastroenterology* **141**, 1762-1772 (2011).
8. K. L. VanDussen, J. M. Marinshaw, N. Shaikh, H. Miyoshi, C. Moon, P. I. Tarr, M. A. Ciorba, T. S. Stappenbeck, Development of an enhanced human gastrointestinal epithelial culture system to facilitate patient-based assays. *Gut* **64**, 911-920 (2015).
9. C. K. Porter, M. S. Riddle, A. N. Alcala, D. A. Sack, C. Harro, S. Chakraborty, R. L. Gutierrez, S. J. Savarino, M. Darsley, R. McKenzie, B. DeNearing, H. Steinsland, D. R. Tribble, A. L. Bourgeois, An Evidence-Based Scale of Disease Severity following Human Challenge with Enterotoxigenic *Escherichia coli*. *PLoS One* **11**, e0149358 (2016).
10. C. Harro, S. Chakraborty, A. Feller, B. DeNearing, A. Cage, M. Ram, A. Lundgren, A. M. Svennerholm, A. L. Bourgeois, R. I. Walker, D. A. Sack, Refinement of a human challenge model for evaluation of enterotoxigenic *Escherichia coli* vaccines. *Clin Vaccine Immunol* **18**, 1719-1727 (2011).
11. D. G. Evans, R. P. Silver, D. J. Evans, Jr., D. G. Chase, S. L. Gorbach, Plasmid-controlled colonization factor associated with virulence in *Escherichia coli* enterotoxigenic for humans. *Infect Immun* **12**, 656-667 (1975).
12. K. K. Baker, M. M. Levine, J. Morison, A. Phillips, E. M. Barry, CfaE tip mutations in enterotoxigenic *Escherichia coli* CFA/I fimbriae define critical human intestinal binding sites. *Cellular Microbiology* **11**, 742-754 (2009).
13. F. C. Dorsey, J. F. Fischer, J. M. Fleckenstein, Directed delivery of heat-labile enterotoxin by enterotoxigenic *Escherichia coli*. *Cell Microbiol* **8**, 1516-1527 (2006).
14. K. Roy, G. M. Hilliard, D. J. Hamilton, J. Luo, M. M. Ostmann, J. M. Fleckenstein, Enterotoxigenic *Escherichia coli* EtpA mediates adhesion between flagella and host cells. *Nature* **457**, 594-598 (2009).
15. J. M. Fleckenstein, K. Roy, Purification of recombinant high molecular weight two-partner secretion proteins from *Escherichia coli*. *Nat Protoc* **4**, 1083-1092 (2009).
16. D. J. Evans, Jr., D. G. Evans, Three characteristics associated with enterotoxigenic *Escherichia coli* isolated from man. *Infect Immun* **8**, 322-328 (1973).
17. R. A. Finkelstein, M. L. Vasil, J. R. Jones, R. A. Anderson, T. Barnard, Clinical cholera caused by enterotoxigenic *Escherichia coli*. *J Clin Microbiol* **3**, 382-384 (1976).
18. H. L. DuPont, S. B. Formal, R. B. Hornick, M. J. Snyder, J. P. Libonati, D. G. Sheahan, E. H. LaBrec, J. P. Kalas, Pathogenesis of *Escherichia coli* diarrhea. *N Engl J Med* **285**, 1-9 (1971).
19. K. L. Kotloff, J. P. Nataro, W. C. Blackwelder, D. Nasrin, T. H. Farag, S. Panchalingam, Y. Wu, S. O. Sow, D. Sur, R. F. Breiman, A. S. Faruque, A. K. Zaidi, D. Saha, P. L. Alonso, B. Tamboura, D. Sanogo, U. Onwuchekwa, B. Manna, T. Ramamurthy, S. Kanungo, J. B. Ochieng, R. Omore, J. O. Oundo, A. Hossain, S. K. Das, S. Ahmed, S. Qureshi, F. Quadri, R. A. Adegbola, M. Antonio, M. J. Hossain, A. Akinsola, I. Mandomando, T. Nhampossa, S. Acacio, K. Biswas, C. E. O'Reilly, E. D. Mintz, L. Y. Berkeley, K. Muhsen, H. Sommerfelt, R. M. Robins-Browne, M. M. Levine, Burden and aetiology of diarrhoeal disease in infants and young children in developing countries (the Global Enteric Multicenter Study, GEMS): a prospective, case-control study. *Lancet* **382**, 209-222 (2013).

20. C. Medus, J. M. Besser, B. A. Juni, B. Koziol, V. Lappi, K. E. Smith, C. W. Hedberg, Long-Term Sentinel Surveillance for Enterotoxigenic *Escherichia coli* and Non-O157 Shiga Toxin-Producing *E. coli* in Minnesota. *Open Forum Infect Dis* **3**, ofw003 (2016).
21. K. Roy, D. Hamilton, K. P. Allen, M. P. Randolph, J. M. Fleckenstein, The EtpA exoprotein of enterotoxigenic *Escherichia coli* promotes intestinal colonization and is a protective antigen in an experimental model of murine infection. *Infect Immun* **76**, 2106-2112 (2008).
22. A. Mahdavi, J. Szychowski, J. T. Ngo, M. J. Sweredoski, R. L. Graham, S. Hess, O. Schneewind, S. K. Mazmanian, D. A. Tirrell, Identification of secreted bacterial proteins by noncanonical amino acid tagging. *Proc Natl Acad Sci U S A* **111**, 433-438 (2014).
23. T. Taki, K. Kibayashi, A simple ABO genotyping by PCR using sequence-specific primers with mismatched nucleotides. *Leg Med (Tokyo)* **16**, 168-172 (2014).
